# Supplementary material for: A comprehensive self-attention melanoma analysis using reliable transformers and explainable AI
Source: PeerJ journal article supplement (doi:10.7717/peerj-cs.3479), 2026-02-06
Supplement: Readme_File.docx [file Readme_File.docx]

**A Comprehensive Vision Transformer-Based Melanoma Classification with Explainable AI**

**Overview**

This project implements a **Vision Transformer (ViT)-based deep learning model** for **melanoma classification** and integrates **Explainable AI techniques** such as **attention visualization** to improve interpretability. The model classifies skin cancer images into **benign** and **malignant** categories using **self-attention mechanisms**.

**Features**

- **Vision Transformer (ViT) Architecture** for improved feature extraction and classification.
- **Explainable AI Methods (Attention Visualization)** for model interpretability.
- **Preprocessing with Data Augmentation** for robust training.
- **Evaluation Metrics**: Accuracy, Recall, Precision.

**Dataset**

The dataset consists of skin cancer images divided into two classes:

/data

/benign

/malignant

Each image is preprocessed and resized to **224x224 pixels** before training.

**Requirements**

Install the required dependencies using:

pip install numpy tensorflow matplotlib opencv-python scikit-learn

**Implementation Steps**

**1. Preprocessing & Augmentation**

- Load and resize images to **224x224** pixels.
- Normalize pixel values to **[0, 1]**.
- Apply **data augmentation** (rotation, width/height shift, flipping, zooming).

**2. Model Architecture (Vision Transformer)**

- **Patch Embedding:** Splits images into patches and projects to embedding space.
- **Multi-Head Self-Attention:** Learns relationships between different image regions.
- **Feed-Forward Network:** Processes learned features for classification.
- **Output Layer:** Binary classification using sigmoid activation.

**3. Model Training**

- **Loss Function:** Binary Crossentropy
- **Optimizer:** Adam (learning rate: **0.0001**)
- **Metrics:** Accuracy, Recall, Precision
- **Training:** 20 epochs with batch size 16.

**4. Evaluation**

- Compute **Test Accuracy, Recall, Precision**.
- Validate performance on unseen data.

**5. Explainability (Attention Visualization)**

- Extract **self-attention weights** from the model.
- Generate **heatmaps** overlayed on original images.
- Identify **most relevant regions** used for classification.

**Usage**

**Train the Model**

python train_vit.py

**Evaluate the Model**

python evaluate_vit.py

**Attention Visualization**

python attention_visualization.py

**Results**

- **Test Accuracy:** 96%
- **Recall:** 95%
- **Precision:** 94%
- **Explainability:** Heatmaps show critical melanoma regions.
